# Supplementary material for: Targeting regulation of ATP synthase 5 alpha/beta dimerization alleviates senescence
Source: Aging (Albany NY). 2022 Jan 30;14(2):678–707. doi: 10.18632/aging.203858 (PMC8833107; doi:10.18632/aging.203858)
Supplement: Supplementary Tables 1 and 2 [file aging-14-203858-s003.pdf]

## SUPPLEMENTARY TABLES

**Supplementary Table 1. Reporting parameters for compound screening data.**

| Category          | Parameter                                | Description                                                                                                           |
|-------------------|------------------------------------------|-----------------------------------------------------------------------------------------------------------------------|
| Assay             | Type of assay                            | Cell-based phenotypic assays.                                                                                         |
|                   | Target                                   | Cell proliferation                                                                                                    |
|                   | Primary measurement                      | Detection of double-stranded DNA using intercalated fluorescence enhancement of fluorophore                           |
|                   | Key reagents                             | Gel Green nucleic acid gel stain and 0.2% SDS                                                                         |
|                   | Assay protocol                           | Key steps are outlined in Supplementary Table 2                                                                       |
|                   | Additional comments                      |                                                                                                                       |
| Library           | Library size                             | 23 compounds arrayed in 96-well plates as single compounds at 10 mM in DMSO                                           |
|                   | Library composition                      | A unique collection of IL-33 inhibitors                                                                               |
|                   | Source                                   | Drug library for IL-33 inhibitors                                                                                     |
|                   | Additional comments                      |                                                                                                                       |
| Screen            | Format                                   | 96-well plate (353072; BD BioSciences)                                                                                |
|                   | Concentration(s) tested                  | 4 $\mu$ M concentration, 1:2,500 dilution                                                                             |
|                   | Plate controls                           | Negative control: No cells (A1-A12)                                                                                   |
|                   | Reagent/compound dispensing system       |                                                                                                                       |
|                   | Detection instrument and software        | VICTOR Multilabel Plate Reader (PerkinElmer, USA)                                                                     |
|                   | Assay validation/QC                      |                                                                                                                       |
|                   | Correction factors                       |                                                                                                                       |
|                   | Normalization                            | (average of six replicates – average of negative control)/<br>(average of DMSO control – average of negative control) |
|                   | Additional comments                      |                                                                                                                       |
| Post-HTS analysis | Hit criteria                             | The inhibitor that led to the highest increase was considered potential hit.                                          |
|                   | Hit rate                                 | 1 out of 23 (4.35%)                                                                                                   |
|                   | Additional assay(s)                      |                                                                                                                       |
|                   | Confirmation of hit purity and structure |                                                                                                                       |
|                   | Additional comments                      |                                                                                                                       |

**Supplementary Table 2. HTS assay protocol table.**

| Step | Parameter                                                                                                         | Value            | Description                                       |
|------|-------------------------------------------------------------------------------------------------------------------|------------------|---------------------------------------------------|
| 1    | Plate cells                                                                                                       | 1,000 cells/well | 1,000 senescent fibroblasts                       |
| 2    | Library compounds                                                                                                 | 200 µl           | 4 µM concentration, 1:2,500 dilution              |
| 3    | Incubation time                                                                                                   | 21 days          | 37°C                                              |
| 4    | Wash cells                                                                                                        | 200 µl           | PBS                                               |
| 5    | Cell lysis                                                                                                        | 50 µl            | 0.2% SDS                                          |
| 6    | Incubation time                                                                                                   | 2 hr             | 37°C                                              |
| 7    | Staining of double-stranded DNA                                                                                   | 150 µl           | Diluted Gel Green solution (1:1,1,000 in D.W.)    |
| 8    | Incubation time                                                                                                   | 10 min           | Gel Green nucleic acid gel stain and              |
| 9    | Assay readout                                                                                                     | 480 and 520 nm   | VICTOR Multilabel Plate Reader (PerkinElmer, USA) |
| Step | Notes                                                                                                             |                  |                                                   |
| 1    | Senescent fibroblasts were plated in 96-well plates at a density of 1,000 cells per well                          |                  |                                                   |
| 2    | Components of the IL-33 inhibitor library were diluted to a final concentration of 4 µM in media.                 |                  |                                                   |
| 3    | Diluted compounds in media was added to wells every 4 days with 12 channel multi pipette.                         |                  |                                                   |
| 4    | At 21 days after drug treatment, cells were washed twice with phosphate-buffered saline (PBS)                     |                  |                                                   |
| 5    | Cells were lysed in 50 µl of 0.2% SDS.                                                                            |                  |                                                   |
| 6    | The plates were incubated at 37°C for 1 hr.                                                                       |                  |                                                   |
| 7    | Gel Green (150 µl) nucleic acid gel stain (1:1,000 in DW) was added to the wells.                                 |                  |                                                   |
| 8    | The plates were incubated at 37°C for 10 min.                                                                     |                  |                                                   |
| 9    | (average of six replicates – average of negative control)/(average of DMSO control – average of negative control) |                  |                                                   |
